# Supplementary figures and images for: "Time sweet time": circadian characterization of galectin-1 null mice
Source: Springer Nature journal article supplement (doi:10.1186/1740-3391-8-4), 2010-04-19

A)

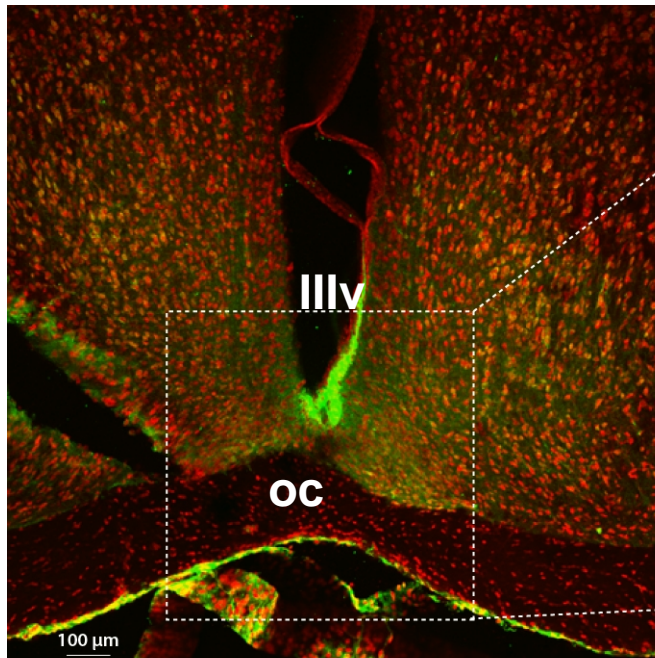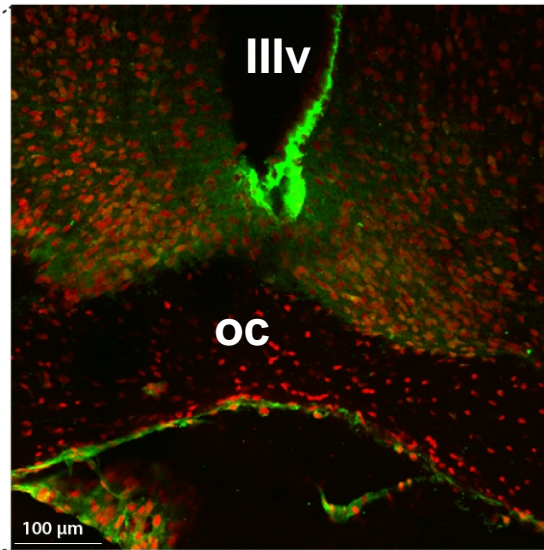

B)

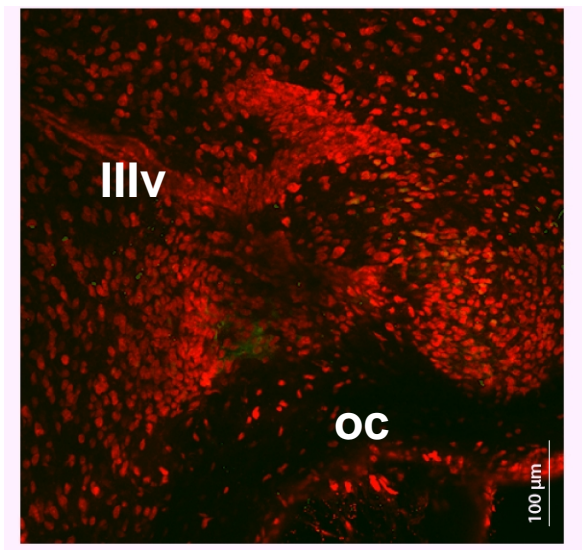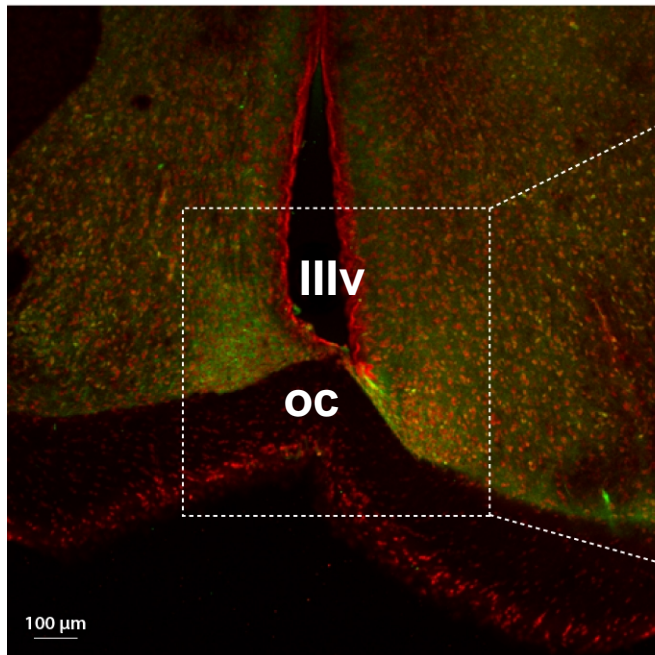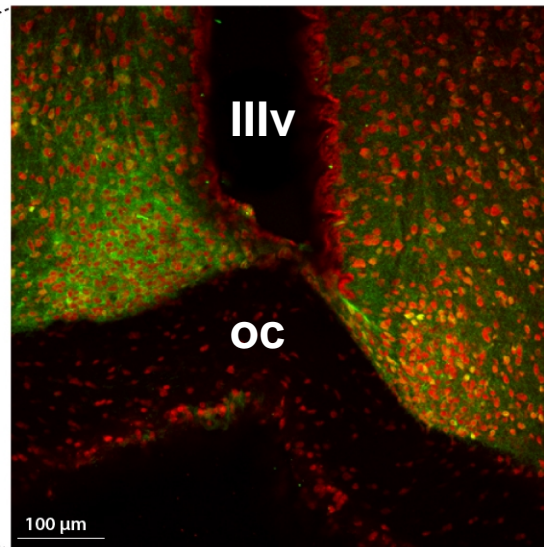

Supplement: Additional file 1 [file 1740-3391-8-4-s1.pdf]
